# Supplementary material
Source: publisher figshare collection journal article supplement (https://gsapubs.figshare.com/ndownloader/files/24571298)
Supplement: Supplementary file 1 [file 24571298]

## Sheet: Sheet1
No.	1	2	3	4	5	6	7	8	9	10	11	12	13	14	15	16	17	18	19	20	21	22	23	24	25	26	27	28	29	30	31	32	33	34	35
Pluton Name	Huangshitan				Sanqingshan													Jiuligang							Ruhong					Heqiao			Siling	Maotan
SiO2	73.92	74.95	75.35	74.16	76.72	77.82	76.28	76.94	77.64	77.02	77.76	76.75	74.65	73.92	74.95	75.35	74.16	73.11	74.26	74.48	74.66	75.54	77.16	74.67	74.9	74.5	76.27	73.12	73.43	76.12	77	76.64	75.93	77.5	76.8
TiO2	0.12	0.08	0.09	0.08	0.14	0.11	0.15	0.11	0.07	0.08	0.08	0.05	0.2	0.12	0.08	0.09	0.08	0.09	0.08	0.08	0.08	0.1	0.09	0.09	0.11	0.06	0.1	0.15	0.14	0.07	0.07	0.08	0.14	0.04	0.08
Al2O3	12.66	11.67	11.72	11.75	11.9	11.42	12.27	11.82	11.84	12.06	12.08	12.22	12.78	12.66	11.67	11.72	11.75	11.32	11.17	11.45	10.26	10.35	11.38	10.68	12.01	11.97	11.71	12.39	12.5	12.78	12.47	12.58	12.71	12.8	12.66
TFe2O3	2.41	4.87	4.07	4.83	1.68889	1.50333	1.65222	1.47111	1.08222	1.33	1.24	1.20111	1.97556	2.41	4.87	4.07	4.83	6.43	6.14	4.9	7.26	5.73	1.6	6.16	4.23	4.64	3.38	5.17	4.32	1.19	1.48	1.04	1.3	0.21	0.97
MnO	0.05	0.04	0.03	0.03	0.05	0.04	0.07	0.04	0.05	0.06	0.05	0.04	0.04	0.05	0.04	0.03	0.03	0.04	0.04	0.04	0.04	0.04	0.05	0.04	0.02	0.04	0.04	0.06	0.04	0.02	0.03	0.03	0.02	0.01	0.03
MgO	0.08	0.05	0.05	0.06	0.12	0.12	0.11	0.08	0.03	0.06	0.04	0.02	0.15	0.08	0.05	0.05	0.06	0.11	0.07	0.08	0.08	0.08	0.04	0.06	0.11	0.11	0.1	0.22	0.21	0.05	0.05	0.05	0.12	0.05	0.09
CaO	0.95	0.55	0.58	0.57	0.66	0.11	0.61	0.61	0.02	0.34	0.04	0.29	0.7	0.95	0.55	0.58	0.57	0.66	0.63	0.64	0.59	0.6	0.66	0.61	0.59	0.5	0.21	0.64	0.64	0.61	0.5	0.55	0.55	0.49	0.64
Na2O	2.88	3.06	3.02	2.92	3.54	2.87	3.47	3.36	3.1	3.41	3.21	3.76	3.53	2.88	3.06	3.02	2.92	2.63	3.26	2.82	2.43	2.45	2.73	2.67	3.3	3.2	2.85	3.03	2.89	3.32	3.23	3.34	3.14	3.46	3.29
K2O	5.95	4.62	4.68	5.38	4.29	4.64	4.7	4.76	4.69	4.57	4.93	4.61	5.19	5.95	4.62	4.68	5.38	5.42	4.09	5.18	4.48	4.6	5.22	4.74	4.35	4.9	4.91	4.96	5.25	5.01	4.4	5.04	5.38	4.84	4.93
P2O5	0	0.01	0.01	0	0.02	0.01	0.02	0.1	<0.01	<0.01	<0.01	<0.01	0.04	0	0.01	0.01	0	0.01	0.01	0.01	0.01	0.01	0	0	0.02	0.01	0.02	0.03	0.02	0.7	0.65	0.53	0.57	0.49	0.4
L.O.I					0.78	0.87	0.77	0.6	0.89	0.73	0.61	0.49	0.82
Total	99.53	99.54	99.53	99.53	99.9089	99.5133	100.102	99.8911	99.4122	99.66	100.04	99.4311	100.076	99.02	99.9	99.6	99.78	99.82	99.75	99.68	99.89	99.5	98.93	99.72	99.64	99.93	99.59	99.77	99.44	99.87	99.88	99.88	99.86	99.89	99.89
Cr	312.61	7.03	7.44	8.32	3.55	3.98	3.61	3.54	3.4	4.39	3.38	2.99	4.61	312.61	7.03	7.44	8.32	9.09	9.62	12.29	10.92	8.62	435.19	10.27	9.07	9.67	6.02	10.89	10	11.27	10.16	12.72	12.43	12.54	10.79
Ga	29.38	29.14	28.89	29.73	22.8	22.5	22.9	21.7	24.6	25	24.2	25.6	23.3	29.38	29.14	28.89	29.73	26.85	28.61	27.65	23.47	23.32	23.53	24.31	18.37	20.46	18.84	17.4	19.04	35.26	33.13	34.12	22.42	19.47	17.78
Rb	431.92	662.82	622.21	569.48	370	444	456	451	520	608	674	641	360	431.92	662.82	622.21	569.48	500.72	421.66	526.13	404.96	426.01	538.95	475.65	267.17	483.92	466.14	312.35	295.81	944.1	996	950.2	467.4	500.8	331.9
Ba	278.42	72.2	54.55	60.06	97.3	57.6	89.9	45.8	43.7	20.1	18.9	24.6	328	278.42	72.2	54.55	60.06	231	256.09	154.17	245.72	152.92	391.29	101.71	114.29	34.39	86.29	167.12	181.12	10.36	6.348	5.567	90.77	73.5	56.31
Sr	35.98	10.93	11.78	12.12	34.3	11.6	14.3	15	7.29	14.4	6.01	7.65	57.2	35.98	10.93	11.78	12.12	17.24	16.44	18.29	18.78	15.84	20.82	15.43	29.8	8.12	19.5	45.49	33	4.545	3.927	2.231	20.24	11.84	14.94
Y	105.55	111.11	124.22	119.01	60.5	58.7	88.6	86	78	118	38	100	53.9	105.55	111.11	124.22	119.01	106.26	132.16	134.4	105.26	115.2	123.19	125.81	68.31	106.68	34.73	55.18	61.97	105.5	69.38	88.45	58.09	74.2	46.63
Zr	130.36	152.9	176.52	162.1	210	175	177	181	114	167	131	133	187	130.36	152.9	176.52	162.1	179.29	197.21	190.84	159.42	165.45	191.04	180.88	108.08	117.01	124.22	96.21	141.14	189.8	155.7	158	190.8	213.6	110.2
Nb	60.17	69.9	75.35	76.9	36.6	97.2	38	48	62	65.1	68	52.8	30	60.17	69.9	75.35	76.9	62.6	73.91	77.39	53.84	56.27	61.38	59.38	32.54	46.41	37.06	23.55	29.65	62.43	42.69	50.17	40.95	21.09	13.78
Hf	6.74	8	8.92	7.8	7.03	6.73	6.64	6.24	5.13	7.84	5.77	6.19	5.72	6.74	8	8.92	7.8	8.17	10.56	9.97	7.53	7.49	9.38	8.82	4.96	6.54	6.19	4.23	5.77	10.63	9.564	9.53	7.075	10.53	5.361
Ta	5.64	8.79	8.13	6.68	4.91	7.81	5.04	5.64	11.8	10.2	10.1	7.44	3.33	5.64	8.79	8.13	6.68	7.72	7.08	6.97	6.23	6.04	7.31	6.48	3.4	7.39	4.15	2.8	3.16	5.958	4.265	5.69	3.677	3.159	2.066
Th	30.48	36.4	45.26	41.52	68.22	62.1	48.3	73.2	59.9	59	52.5	55.6	53.4	30.48	36.4	45.26	41.52	35.72	50.21	48.83	31.35	33.85	38.5	41.43	41.69	51.46	49.16	33.18	47.55	39.13	38.11	41.82	42.67	70.47	28.45
U	10.18	15.36	14.65	13.49	20.6	29.6	19.5	30	35.6	23.2	24.9	23.5	10.3	10.18	15.36	14.65	13.49	12.17	19.17	20.98	13.21	13.64	13.69	12.6	12.54	15.63	8.64	6.36	10.33	9.259	9.625	7.883	15.77	9.976	6.72
La	47.06	52.74	58.44	55.79	65.2	41.8	54.4	45.1	43.8	48.3	33	47.9	73.5	47.06	52.74	58.44	55.79	58.43	51.2	53.34	55.93	61.19	70.14	65.83	29.69	28.72	30.9	33.2	44.78	59.25	50.94	49.72	66.32	10.33	21.66
Ce	95.05	110.33	122.84	111.42	148	91.3	127	95.5	98.6	105	67.7	125	162	95.05	110.33	122.84	111.42	123.95	113.9	113.16	117.19	129.55	149.13	140.18	68.41	70.83	76.77	74.26	95.71	114.8	92.1	94	130	28.63	50.91
Pr	10.33	12.2	13.57	11.82										10.33	12.2	13.57	11.82	13.46	12.96	12.65	13.05	14.27	16.1	15.28	8.03	8.95	8.07	8.65	11.33	12.73	10.18	9.987	14.49	4.406	6.752
Nd	35.62	42.06	46.87	39.2	48.3	36.7	47.2	38.9	37	42.5	23.2	41.1	50	35.62	42.06	46.87	39.2	46.03	43.67	43.15	44.81	49.04	55.46	53.09	28.6	33.2	28.15	31.45	41.21	42.03	31.84	31.81	48.39	19.54	26.3
Sm	8.64	9.87	11.03	9.25	8.27	7.8	9.46	8.02	6.84	9.28	4.36	9.32	8.06	8.64	9.87	11.03	9.25	10.39	10.47	10.44	10.23	11.4	12.6	12.31	6.3	8.91	5.74	7.07	8.95	9.154	6.673	7.19	9.017	6.91	7.082
Eu	0.22	0.15	0.17	0.1	0.31	0.18	0.28	0.18	0.08	0.09	0.05	0.07	0.55	0.22	0.15	0.17	0.1	0.21	0.14	0.12	0.2	0.18	0.24	0.17	0.29	0.12	0.21	0.43	0.43	0.059	0.032	0.037	0.217	0.059	0.212
Gd	9.58	10.52	11.8	10.04	7.18	7.28	8.67	7.65	6.04	9.09	3.9	8.62	7.08	9.58	10.52	11.8	10.04	10.99	11.3	11.52	10.87	12.2	12.99	12.8	6.48	9.76	4.97	6.96	8.63	8.724	6.086	6.875	7.646	7.342	6.435
Tb	1.92	2.07	2.32	2.02	1.17	1.43	1.58	1.47	1.22	1.83	0.74	1.77	1.11	1.92	2.07	2.32	2.02	2.08	2.31	2.3	2.08	2.34	2.54	2.49	1.16	1.86	0.89	1.25	1.53	1.889	1.34	1.588	1.395	1.606	1.227
Dy	13.3	14.49	16.07	14.45	7.34	10.1	10.6	9.75	8.91	12.7	5.16	12.6	6.73	13.3	14.49	16.07	14.45	14.14	16.78	16.38	14.3	16	17.21	16.87	7.81	13.02	5.54	8.13	9.54	13.65	9.551	11.64	8.82	11.44	7.868
Ho	2.91	3.18	3.51	3.22	1.41	2.02	2.08	1.96	1.86	2.58	1.04	2.52	1.27	2.91	3.18	3.51	3.22	3.07	3.73	3.7	3.11	3.45	3.69	3.63	1.63	2.54	1.18	1.72	2	3.107	2.189	2.675	1.939	2.575	1.628
Er	9.27	10.28	11.28	10.63	5.33	7.53	7.96	7.32	7.32	9.84	3.95	9..73	4.61	9.27	10.28	11.28	10.63	9.71	12.42	12.27	10	10.96	11.77	11.72	5.37	8.48	3.87	5.48	6.16	10.21	7.057	8.698	5.946	7.798	4.657
Tm					0.81	1.13	1.26	1.13	1.16	1.53	0.62	1.54	0.68
Yb	10.36	11.96	13.12	12.75	6.26	8.38	9.75	8.6	9.25	11.6	4.82	12.1	5.06	10.36	11.96	13.12	12.75	10.88	15.51	15.2	11.76	12.33	13.41	13.33	6.91	11.27	4.77	6.43	6.68	12.93	8.667	11.18	6.55	8.958	5.154
Lu	1.4	1.57	1.71	1.72	0.89	1.1	1.37	1.2	1.27	1.62	0.65	1.63	0.69	1.4	1.57	1.71	1.72	1.48	2.06	2.06	1.62	1.65	1.76	1.76	1.16	1.89	0.69	0.93	0.96	2.005	1.37	1.753	1.051	1.409	0.798
Eu*	0.0739276	0.0450037	0.0455558	0.0317239	0.12299	0.0730269	0.0945206	0.0702552	0.0380511	0.0299578	0.0370696	0.0238759	0.222588	0.0739276	0.0450037	0.0455558	0.0317239	0.0600809	0.0393495	0.0334525	0.057983	0.046662	0.0573515	0.0414036	0.13876	0.0393406	0.120201	0.187404	0.149581	0.0201842	0.0153514	0.0160888	0.0798979	0.0253238	0.096008
K	49393.9	38352.9	38851	44662	35613.4	38518.9	39017	39515.1	38934	37937.8	40926.3	38269.9	43084.7	49393.9	38352.9	38851	44662	44994.1	33953.1	43001.7	37190.7	38186.9	43333.8	39349.1	36111.5	40677.3	40760.3	41175.4	43582.8	41590.5	36526.6	41839.5	44662	40179.2	40926.3
Ti	719.279	479.519	539.459	479.519	839.159	659.339	899.098	659.339	419.579	479.519	479.519	299.7	1198.8	719.279	479.519	539.459	479.519	539.459	479.519	479.519	479.519	599.399	539.459	539.459	659.339	359.639	599.399	899.098	839.159	419.579	419.579	479.519	839.159	239.76	479.519
P	0	43.6382	43.6382	0	87.2764	43.6382	87.2764	436.382					174.553	0	43.6382	43.6382	0	43.6382	43.6382	43.6382	43.6382	43.6382	0	0	87.2764	43.6382	87.2764	130.915	87.2764	3054.67	2836.48	2312.82	2487.38	2138.27	1745.53
A/CNK	0.981008	1.0576	1.05699	1.00745	1.01999	1.14849	1.0307	1.00267	1.15938	1.07927	1.13009	1.04423	1.00652	0.981008	1.0576	1.05699	1.00745	0.9936	1.02147	1.00356	1.03436	1.02473	1.00344	1.00453	1.07139	1.04297	1.12762	1.07583	1.07756	1.06559	1.13518	1.05275	1.06017	1.08278	1.0628
∑REE	245.66	281.42	312.73	282.41	300.47	216.75	281.61	226.78	223.35	255.96	149.19	264.17	321.34	245.66	281.42	312.73	282.41	304.82	296.45	296.29	295.15	324.56	367.04	349.46	171.84	199.55	171.75	185.96	237.91	290.538	228.025	237.153	301.781	111.003	140.683
∑LREE	196.92	227.35	252.92	227.58	270.08	177.78	238.34	187.7	186.32	205.17	128.31	223.39	294.11	196.92	227.35	252.92	227.58	252.47	232.34	232.86	241.41	265.63	303.67	286.86	141.32	150.73	149.84	155.06	202.41	238.023	191.765	192.744	268.434	69.875	112.916
∑HREE	48.74	54.07	59.81	54.83	30.39	38.97	43.27	39.08	37.03	50.79	20.88	40.78	27.23	48.74	54.07	59.81	54.83	52.35	64.11	63.43	53.74	58.93	63.37	62.6	30.52	48.82	21.91	30.9	35.5	52.515	36.26	44.409	33.347	41.128	27.767
LREE/HREE	4.04021	4.20473	4.22872	4.15065	8.88713	4.56197	5.5082	4.80297	5.0316	4.03957	6.14511	5.47793	10.801	4.04021	4.20473	4.22872	4.15065	4.82273	3.62408	3.67113	4.49218	4.50755	4.79202	4.58243	4.63041	3.08746	6.83889	5.01812	5.70169	4.53248	5.28861	4.3402	8.04972	1.69896	4.06655
(La/Sm)N	3.42619	3.36121	3.33279	3.79391	4.95924	3.37097	3.61727	3.53733	4.02801	3.27395	4.76102	3.2329	5.73621	3.42619	3.36121	3.33279	3.79391	3.53747	3.07607	3.21385	3.43908	3.37636	3.50161	3.36387	2.96444	2.02759	3.38625	2.95387	3.14727	4.07146	4.80187	4.34986	4.62653	0.940362	1.92387
(Gd/Yb)N	0.746195	0.709792	0.725763	0.635433	0.925543	0.701026	0.717565	0.71781	0.526916	0.632343	0.652926	0.574868	1.12909	0.746195	0.709792	0.725763	0.635433	0.815108	0.587913	0.611583	0.74588	0.798442	0.781676	0.774866	0.756734	0.698831	0.840784	0.873464	1.04251	0.544457	0.566643	0.496224	0.941975	0.661378	1.00751
(La/Yb)N	3.0625	2.97299	3.00304	2.95006	7.02195	3.36292	3.76165	3.5356	3.1924	2.8072	4.61585	2.66891	9.79313	3.0625	2.97299	3.00304	2.95006	3.62069	2.22558	2.36589	3.20643	3.34582	3.52632	3.32949	2.89679	1.71809	4.36742	3.48106	4.51952	3.0894	3.96255	2.99829	6.82634	0.777452	2.83334
Reference	Li et al., 2013				Zhang et al., 2008													Li et al., 2013							Li et al., 2013					Li et al., 2013			Li et al., 2013	Li et al., 2013
